# Supplementary material for: Freshness flavour perception via quantum-inspired and quantum ligand-based virtual screening
Source: Research Square preprint supplement (doi:10.21203/rs.3.rs-6062772/v1), 2025-05-15
Supplement: Supplementary file 1 [file 54d2c4be68901c94db3ef45a.docx]

**Supporting information**

1. **Molecular Graphs**
   1. **Nodes**

- Atomic number
- Number of implicit hydrogens
- Formal charge
- Partial charge: the partial charge of an atom represents the uneven distribution of charge in a bond
- Degree: number of bonds that the atom is involved in
- Bond order: list of the type of bonds that the atom is involved in
- Donor: whether the atom is hydrogen donor
- Acceptor: whether the atom is hydrogen acceptor
- Hydrophobic: whether the atom is hydrophobic
- Aromatic: whether the atom is aromatic
- and the edges are labelled as well with the following information
- Distance: 3D distance along a given bond
- Bond type: the type of bond that the edge is representing.
  1. **Artificial nodes**
- Atomic number: data container with the atomic number of the atoms in the cyclic structure
- Number of implicit hydrogens: total number of implicit hydrogens of all atoms in the collapsed ring
- Formal charge: total collective formal charge of all atoms in the ring
- Partial charge: total collective partial charge of all atoms in the ring
- Degree: number of bonds the artificial node is involved in, both real and artificial
- Position: geometric center of the ring
- Donor: whether there is at least one donor atom in the ring
- Acceptor: whether there is at least one acceptor atom in the ring
- Hydrophobic: whether there is at least one hydrophobic atom in the ring
- Aromatic: whether there is at least one aromatic atom in the ring

The compare methods were also adapted for rings

- 1. **Conflict graph**

1. Node type: if both nodes have the same atomic number, they are added to the conflict graph

- when using the ring collapse simplification
  - rings are only allowed to be matched to rings
  - rings must have the same size
  - aromatic rings can only be matched to aromatic rings

1. Pharmacophoric features: if both nodes have one pharmacophoric feature in common, they are added to the conflict graph

Moreover, edges will be drawn between tuples of nodes, if they are in conflict according to the following set of rules:

- Bijection: two nodes from the conflict graph involve the same node from the molecular graphs:

This way it is ensured that no node is matched to more than node from the other molecule.

- Comparing bonds for a given node pair can result in a conflict in three different ways:
  - Edge: the two nodes in target molecule are bonded but the ones from query molecule are not, or viceversa.
  - Bond type: bond type differs
  - Distance: distances along the bonds differ more than a given threshold

Nodes in the conflict graph will have an associated weight representing the similarity between individual nodes of the query and target molecular graphs which form the possible matching in the conflict graph.

- 1. **Comparing two nodes**

It represents the similarity between individual nodes, such that the tuple representing identical nodes has a weight equal to the unity.

The compare function of two nodes is the weighted sum of terms comparing each label. For each label , we choose a method to compare the values of the two atoms and . There are two possibilities:

Tables 1 *s.i.* and 2 *s.i.* include the comparison method and the importance for each labels for single atom nodes and ring nodes, respectively.

Table 1 s.i.. Comparison method per label between two nodes representing individual atoms, one from each molecule being compared.

| **Label** | **Compare method (ωtab)** | **Importance (αtab)** |
| --- | --- | --- |
| Atomic number | Compare_rate | 1 |
| Number of implicit hydrogens | Compare_binary | 1 |
| Formal charge | Compare_binary | 1 |
| Partial charge | Compare_gaussian | 1 |
| Degree | Compare_gaussian | 1 |
| Bond order | Compare_binary | 1 |
| Donor | Compare_binary | 3 |
| Acceptor | Compare_binary | 3 |
| Hydrophobic | Compare_binary | 3 |
| Aromatic | Compare_binary | 3 |

Table 2 s.i. Comparison method per label between two nodes representing individual rings, one from each molecule being compared.

| **Label** | **Compare method (ωtab)** | **Importance (αtab)** |
| --- | --- | --- |
| Atomic number | Compare_rate | 1 |
| Number of implicit hydrogens | Compare_binary | 1 |
| Formal charge | Compare_binary | 1 |
| Partial charge | Compare_gaussian | 1 |
| Degree | Compare_gaussian | 1 |
| Double | Compare_binary | 3 |
| Bond order | Compare_binary | 1 |
| Donor | Compare_binary | 3 |
| Acceptor | Compare_binary | 3 |
| Hydrophobic | Compare_binary | 3 |
| Aromatic | Compare_binary | 0 |

The final weight of the comparison between two nodes is given by

Where is the normalization factor.

- 1. **Building the conflict graph**


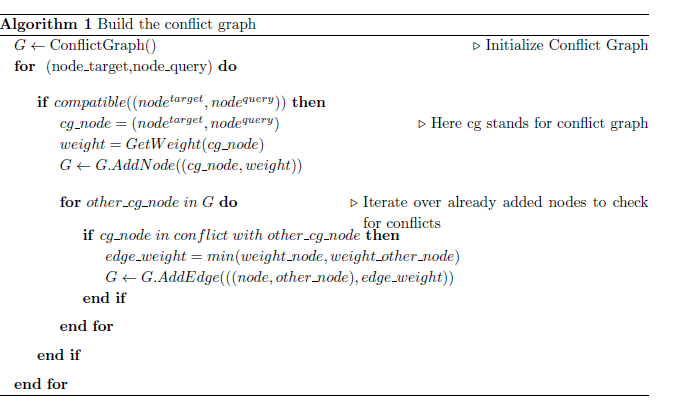


- 1. **Illustrate ring collapse issue**

We would like to illustrate the problem that we found when using rdkit's default ring structure detection method.

Take the case of isocineole, when comparing it to menthol without collapsing the rings, it was found to be quite similar to menthol (Figure 1 *s.i.*).

In particular, the ring in menthol is mapped to isocineole's outer ring.

However, this outer ring is not detected as a cyclic structure by rdkit with the default method, because it is not a minimal cyclic structure: there are two other rings with 5 atoms instead of 6.


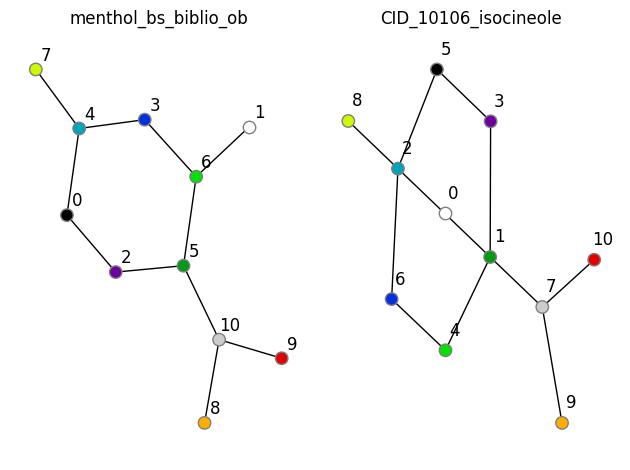


Figure 1 s.i. Side by side mapping of atoms from menthol to isocineole. Atoms of the same colour other than white are mapped to each other.

- 1. **Tuning a Quantum Approximate Optimisation Algorithm (QAOA)**
     1. **Derivation of the problem Hamiltonian**

From the problem Hamiltonian and mixer Hamiltonian, and considering that the and represent single-qubit rotations about the x-axis and z-axis, respectively, and , we can generate the unitary operators for constructing the quantum circuit as:

,

,

,

Note that , , , and stand for problem operator, objective operator, constraint operator, and mixer operator. is a rotation about implementable as a combination of single-gates, gates, and two-qubits gates, CNOT gates, where the power of entanglement is. Note that a problem of an -node conflict graph maps to an -qubit quantum circuit.

- - 1. **Training**

The input of the QAOA is a set of parameters, and the output is a distribution associated with an energy. The objective is to find the set of parameters that encapsulate the solution through an optimiser that trains the parameters of the quantum circuit by minimising the MWIS Hamiltonian (1). Differential evolution (DE) is a genetic algorithm that is advisable for avoiding local minima 76. DE simultaneously explores different points of the parameter landscape by stochastically mutating and recombining generations of individuals. First, DE generates the population of individuals or an ensemble of sets of parameters to feed the quantum circuit. Therefore, there are as many quantum circuits to run as individuals generated. Concerning the size of the population, there must be a balance between computational time and exploration capability.

Then, a loop of mutation-recombination and selection of the individual for the next generation starts. DE mutates each individual by mixing with others to create a trial individual. The chosen mutation-recombination strategy is *best1exp* 77, in which mutant is built from the difference of two randomly chosen individuals multiplied by a mutation factor,with better results in a previous work 76. After the mutation, all the parameters of each individual change. Then, the original and the mutant recombine through a crossover probability. The higher the crossover probability, the higher the number of parameters mutated in the following generation. Then, a trial individual is created, and its energy can be evaluated. Choosing whether the original or the trial individual will depend on the one which minimises the energy. To enhance the chances of finding the solution, increase the population size or the mutation factor but decrease the crossover probability for widening the search radius and slowing the convergence. Finally, the solution is the distribution from the last best individual, the one with the lowest energy of the population.

We use the approximation ratio as a metric to evaluate the performance of the algorithm. 46,57–59. The AR is the ratio between the energy of the distribution and the proper solution. Achieving AR close to 1 means the hybrid algorithm filters spurious solutions.


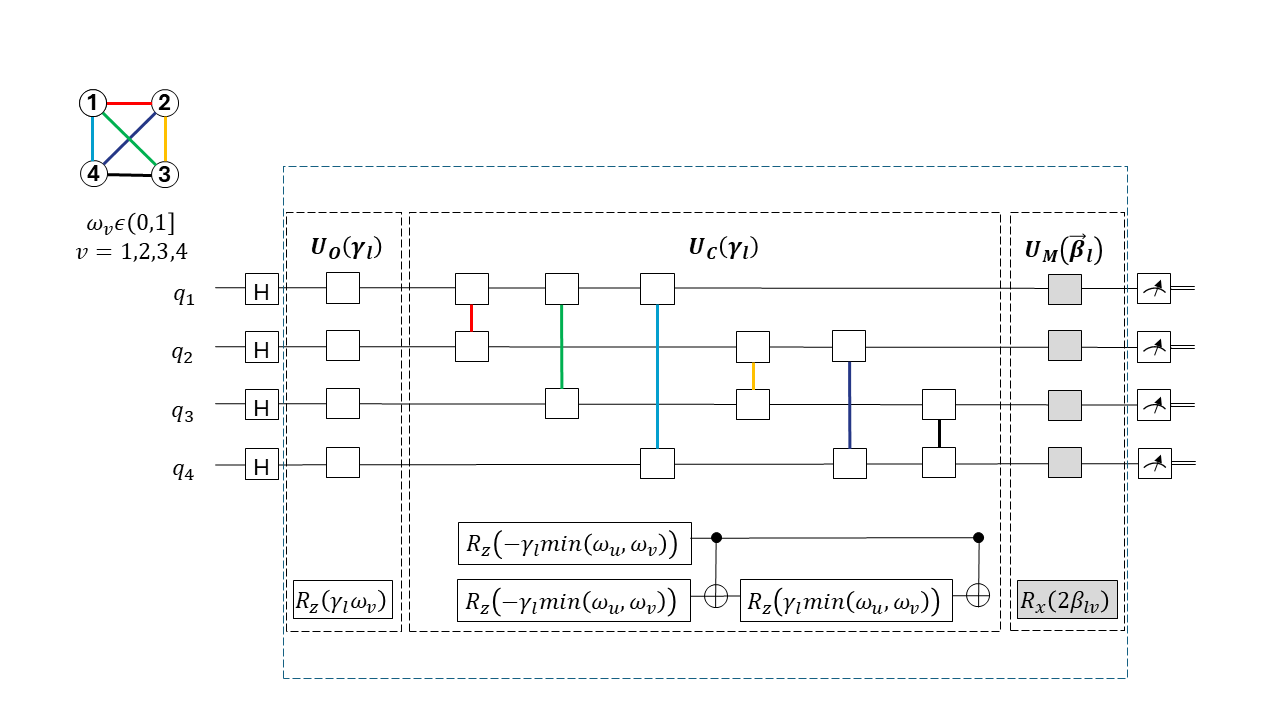


Figure 2 s.i. 1-layer MWIS QAOA proposal for a -nodes conflict graph with all-to-all connections with a constraint rate . The initial state is the maximum superposition attained through the Hadamard gates. The objective operator consists of gates for each layer and each qubit . The constraint operator combines gates, CNOT gates, and applied where connections exist. The mixer operator requires gates for each layer and each qubit . For adding more layers, we can repeat the outer dashed box while changing the corresponding and parameters. At the end, the measurement operators.

- - 1. **Extracting the results**

First, we extract the raw outputs from the QAOA. To do so, we settle l=2 layers for our QAOA proposal by setting the constraint rate to =2, equation (1). As each layer has 1+n parameters, a circuit of n qubits has 2(1+n) parameters. Computational times and DE parameters, tol and maxiter, are reflected in Table 17 *si*. The number of individuals of the DE is equal to the number of parameters of the problem to solve, 2(1+n), gathered by the parameter popsize, popsize=1.

Nevertheless, ARs are above , where Figure 3b from the main text shows the worst-case scenario and Figure 3c, the best. The initial state of the qubits is the superposition state, . Its energy spectrum was calculated classically by brute force. Figures 3 b, c show the normalised energy distribution of the initial state , the objective state in dashed line and the energy distribution obtained with our QAOA proposal for the extreme cases .

11 out of 62 solutions are achieved searching in a limited space from the QAOA output with post-processing. 9 of them are the 22-qubit cases that could be solved by increasing the computational time. The other 2 cases are bounded by a high resolution that needs an out-of-scope number of shots for any variational quantum algorithm Table 17 *si.* In any case, our QAOA proposal yields a solution with high ARs demonstrating its ample capability to tackle the virtual screening problem.

1. **Database**
   1. **Full database**

Table 3 s.i. Freshness classification of hop and botanical molecules database.

| Group 1 | Group 2 | Group 3 | Group 4 |
| --- | --- | --- | --- |
| Icilin | cis-geranylacetate | cedrol | cadina-3,5-diene |
| menthol | verbenyl-ethyl-ether | linalool | gamma-cadinene |
| eucalyptol | selina-1,4-diene | tau-cadinol | alpha-calacorene |
| p-mentha-1,5,8-triene | cubenene | o-cresol | trans-calamenene |
| beta-z-curcumen-12-ol | selina-3,7-11-diene | guaiyl-acetate | 2-propenenitrile |
| beta-copaene-4-alpha-ol | betacymene | lavandulyl-acetate | humulene |
| isocineole | o-cymene | ethyl-geranyl-ether | alpha-cadinene |
| l-alpha-terpineol | gamma-elemene | d-limonene | neo-allo-ocimene |
| trans-4-thujanol | elixene | delta-cadinene | 3-carene |
| alpha-terpinylacetate | beta-cadinene | silvestrene | anethole |
| terpinen-4-ol | beta-cubebene | psilimonene | caryophyllene |
| 2-bornanone | alpha-terpinolene | gamma-muurolene | 2-propynal |
| alphapinene | cis-thujopsene | sesquithujene | isocaryophyllene |
| camphene | beta-cyclogermacrane | isoterpinolene | beta-caryophyllene |
| betapinene | alpha-terpinene | cosmene |  |
| alphafenchene | alpha-thujone | 2,4-thujadiene |  |
|  | beta-elemene | perillene |  |
|  | alpha-cedrene | aristolene |  |
|  | alpha-curcumene | nonanal |  |
|  | gamma-terpinene | calarene |  |
|  | alpha-phellandrene | 1,4-cyclohexadiene |  |
|  | beta-selinene |  |  |
|  | sabinene |  |  |
|  | alphathujene |  |  |
|  | alpha-zingiberene |  |  |
|  | beta-sesquiphellandrene |  |  |
|  | beta-cedrene |  |  |
|  | alpha-cubebene |  |  |

Being group 1 < group 2 < group 3 < group 4 regarding their freshness level.

This classification was made according to The Good Scents Company database and expertise knowledge of Hijos de Rivera SAU.

Group 1: highly fresh.

Group 2: fresh, slightly frutal or floral.

Group 3: citric, floral, slightly fresh.

Group 4: not fresh, predominancy of other aromas/sensations.

Table 4 s.i. Flavour and odour of hop and botanical molecules.

| **Molecule** | **Flavour/odour** |
| --- | --- |
| alfaThujene | Eucalyptus |
| 2-Propynal | Chemical, sweet, harsh, winy |
| alfa pinene | cooling, woody, piney, turpentine-like, minty, eucalyptus, champor |
| 1,4-Cyclohexadiene | Citrus |
| alfa fenchene | camphoreus |
| Camphene | camphor, mothball, oil, warm |
| Thujadiene | Floral |
| Cosmene | Floral |
| Sabinene | woody, spicy, citrus, terpenic, green, oily, camphoreous |
| Beta cymene | fresh, citrus, terpene, woody, spice |
| Psi limonene | citrus |
| L beta pinene | cooling, woody, piney, turpentine-like, minty, eucalyptus, champor |
| 2-Propenenitrile | onion, garlic-like |
| p-Mentha-1,5,8-triene | fresh, minty |
| .alpha.-Phellandrene | minty, terpenic |
| 3-Carene | sweet and pungent, fir needles, musky earth and damp woodlands |
| alfa.-Terpinene | woody, piney, citrus lemon and lime |
| Isocineole | camphor, cooling, minty, green, piney, spicy, terpenic |
| D-Limonene | citrus, mint |
| o-Cymene | harsh terpene, citrusy, green, woody, tropical fruity, Warm-herbaceous diffusive odor, Neroli, fresh, terpene-like, licorice, anise, citrus-lime |
| Sabinene | woody, spicy, citrus, terpeni,c green, oily, camphoreous |
| Eucalyptol | camphor, cool, mint |
| 3-Carene | sweet and pungent, fir needles, musky earth and damp woodlands |
| .gamma.-Terpinene | bitter, citrus |
| Isoterpinolene | fresh, lilac, woody, floral |
| alfa terpinolene | pine, floral |
| Perillene | wody, flower, citrus |
| trans bornyl acetate | woody, pine, herbal, cedar, spicy, camphoreour, mentholic, spicy, berry |
| Linalool | coriander, floral, lavender, lemon, rose |
| Nonanal | fruity, floral, rose-orange flavour |
| trans-4-thujanol | Eucalyptus, minty, green, woody, cool, oily |
| Thujone | cedar, thujonic |
| Verbenyl ethyl ether | camphor, wood, cedarwood, eucalyptus, blueberry, floral, camomile |
| Linalyl acetate | sweet, green, citrus, lavender, bergamot, woody, terpy |
| Linalyl butyrate | floral, fruty, sweet, bergamot, banana, pinneaple-like, citrus, berry, fruity |
| Fenchol | camphoreous, pine, woody, dry, rooty, sweet, lemon, minty, earthy, hummus, medicinal |
| cis-Sabinene hydrate | Eucalyptus, minty, green, woody, cool, oily (4-thujanol) |
| Verbenyl ethyl ether | camphor, wood, cedarwood, eucalyptus, blueberry, floral, camomile |
| (+)-2-Bornanone | camphor (laurel camphor) |
| Terpinen-4-ol | woody, mentholic, citrus, terpenic, spicy, musty, sweet |
| trans-4-thujanol | Eucalyptus, minty, green, woody, cool, oily |
| trans bornyl acetate, | woody, pine, herbal, cedar, spicy, camphoreour, mentholic, spicy, berry |
| L-.alpha.-Terpineol | pine, terpenic, lilac, citrus, woody, floral, resinous |
| Geranyl ethyl ether | ethereal, fruity, green |
| Cedrol | woody, amber, floral, cedar |
| Lavandulyl acetate | floral, lavender-like |
| .tau.-Cadinol | balsamic, earthy |
| L bornyl acetate | woody, pine, herbal, cedar, spicy, camphoreour, mentholic, spicy, berry |
| Anethole | sweet, anise, licorice, mimosa, medicinal |
| cis-Thujopsene | woody, fresh |
| .gamma.-Elemene | herbal, waxy, fresh |
| .alpha.-Cubebene | herbal, waxy |
| .alpha.-Terpinyl acetate | herbal, bergamot, lavender, lime, citrus, woody, floral, waxy, clean, spicy |
| Copaene | piney, woody, spicy, honey |
| cis-geranyl acetate | floral, rose, lavender, green, waxy, herbal, cooling, |
| beta elemene | herbal, waxy, fresh |
| isoledene | pine, camphor |
| Sesquithujene | sweet, citrus |
| beta cyclogermacrane | green, woody |
| o-cresol | musty, phenolic, plastic, medicinal, herbal, leathery |
| Caryophyllene | fried, spice, wood |
| beta cedrene | pine, wood |
| cis-Thujopsene | woody, fresh |
| beta Gurjunene o calarene | woody, patchoulli |
| guaiyl acetate | Woody, fatty, green tea aroma |
| cadina-3,5-diene | spicy, fruity, mango |
| Humulene | earthy, slightly spicy, peppery flavour |
| .gamma.-Muurolene | herbal, woody, spicy |
| alfa curcumene | herbal |
| alfa cedrene | woody, cedar, sweet, fresh |
| alfa zingiberene | spice, fresh, harsh |
| cadina-3,5-dieene | spicy, fruity, mango |
| beta cubebene | herbal, waxy |
| .gamma.-Muurolene | herbal, woody, spicy |
| (-)-Aristolene | citrus |
| beta selinene | herbal |
| selina-diene | herbal, woody |
| gamma cadinene | fruity |
| Elixene | green, woody, oily |
| Neo-allo-ocimene | floral |
| beta cadinene | fresh, woody, herbal, vetiver, longifolone |
| beta sesquiphellandrene | herbal, fruit, wood |
| trans-Calamenene | weak spicy |
| delta cadinene | Thyme, herbal, woody, dry forest |
| isoledene | pine, camphor |
| alfa cadinene | woody, dry |
| .alpha.-Muurolene | herbal, woody, spicy |
| Selina-3,7(11)-diene | herbal, woody |
| .alpha.-Calacorene | woody |

- 1. **Reduced database**

Database including only those molecules which give rise to conflict graphs with 22 nodes.

Table 5 s.i. Freshness classification of hop and botanical molecules database.

| Group 1 | Group 2 | Group 3 | Group 4 |
| --- | --- | --- | --- |
| Icilin | selina-1,4-diene | cedrol | cadina-3,5-diene |
| menthol | Cubenene | o-cresol | gamma-cadinene |
| eucalyptol | selina-3,7-11-diene | d-limonene | alpha-calacorene |
| p-mentha-1,5,8-triene | Betacymene | delta-cadinene | trans-calamenene |
| isocineole | o-cymene | silvestrene | 2-propenenitrile |
| l-alpha-terpineol | beta-cadinene | psilimonene | humulene |
| trans-4-thujanol | alpha-terpinolene | gamma-muurolene | alpha-cadinene |
| terpinen-4-ol | cis-thujopsene | isoterpinolene | 3-carene |
| 2-bornanone | beta-cyclogermacrane | 2,4-thujadiene | anethole |
| alphapinene | alpha-terpinene | aristolene | caryophyllene |
| camphene | alpha-thujone | calarene | 2-propynal |
| betapinene | alpha-cedrene |  | isocaryophyllene |
| alphafenchene | gamma-terpinene |  | beta-caryophyllene |
|  | alpha-phellandrene |  |  |
|  | beta-selinene |  |  |
|  | Sabinene |  |  |
|  | Alphathujene |  |  |
|  | beta-cedrene |  |  |

Being group 1 < group 2 < group 3 < group 4 regarding their freshness level.

This classification was made according to The Good Scents Company database and expertise knowledge of Hijos de Rivera SAU.

Table 6 s.i. Flavour and odour of hop and botanical molecules.

| **Molecule** | **Flavour/odour** |
| --- | --- |
| alfaThujene | Eucalyptus |
| 2-Propynal | Chemical, sweet, harsh, winy |
| alfa pinene | cooling, woody, piney, turpentine-like, minty, eucalyptus, champor |
| 1,4-Cyclohexadiene | Citrus |
| alfa fenchene | camphoreus |
| Camphene | camphor, mothball, oil, warm |
| Thujadiene | Floral |
| Cosmene | Floral |
| Sabinene | woody, spicy, citrus, terpenic, green, oily, camphoreous |
| Beta cymene | fresh, citrus, terpene, woody, spice |
| Psi limonene | citrus |
| L beta pinene | cooling, woody, piney, turpentine-like, minty, eucalyptus, champor |
| 2-Propenenitrile | onion, garlic-like |
| p-Mentha-1,5,8-triene | fresh, minty |
| .alpha.-Phellandrene | minty, terpenic |
| 3-Carene | sweet and pungent, fir needles, musky earth and damp woodlands |
| alfa.-Terpinene | woody, piney, citrus lemon and lime |
| Isocineole | camphor, cooling, minty, green, piney, spicy, terpenic |
| D-Limonene | citrus, mint |
| o-Cymene | harsh terpene, citrusy, green, woody, tropical fruity, Warm-herbaceous diffusive odor, Neroli, fresh, terpene-like, licorice, anise, citrus-lime |
| Sabinene | woody, spicy, citrus, terpeni,c green, oily, camphoreous |
| Eucalyptol | camphor, cool, mint |
| 3-Carene | sweet and pungent, fir needles, musky earth and damp woodlands |
| .gamma.-Terpinene | bitter, citrus |
| Isoterpinolene | fresh, lilac, woody, floral |
| alfa terpinolene | pine, floral |
| Perillene | wody, flower, citrus |
| trans bornyl acetate | woody, pine, herbal, cedar, spicy, camphoreour, mentholic, spicy, berry |
| Linalool | coriander, floral, lavender, lemon, rose |
| Nonanal | fruity, floral, rose-orange flavour |
| trans-4-thujanol | Eucalyptus, minty, green, woody, cool, oily |
| Thujone | cedar, thujonic |
| Verbenyl ethyl ether | camphor, wood, cedarwood, eucalyptus, blueberry, floral, camomile |
| Linalyl acetate | sweet, green, citrus, lavender, bergamot, woody, terpy |
| Linalyl butyrate | floral, fruty, sweet, bergamot, banana, pinneaple-like, citrus, berry, fruity |
| Fenchol | camphoreous, pine, woody, dry, rooty, sweet, lemon, minty, earthy, hummus, medicinal |
| cis-Sabinene hydrate | Eucalyptus, minty, green, woody, cool, oily (4-thujanol) |
| Verbenyl ethyl ether | camphor, wood, cedarwood, eucalyptus, blueberry, floral, camomile |
| (+)-2-Bornanone | camphor (laurel camphor) |
| Terpinen-4-ol | woody, mentholic, citrus, terpenic, spicy, musty, sweet |
| trans-4-thujanol | Eucalyptus, minty, green, woody, cool, oily |
| trans bornyl acetate, | woody, pine, herbal, cedar, spicy, camphoreour, mentholic, spicy, berry |
| L-.alpha.-Terpineol | pine, terpenic, lilac, citrus, woody, floral, resinous |
| Geranyl ethyl ether | ethereal, fruity, green |
| Cedrol | woody, amber, floral, cedar |
| Lavandulyl acetate | floral, lavender-like |
| .tau.-Cadinol | balsamic, earthy |
| L bornyl acetate | woody, pine, herbal, cedar, spicy, camphoreour, mentholic, spicy, berry |
| Anethole | sweet, anise, licorice, mimosa, medicinal |
| cis-Thujopsene | woody, fresh |
| .gamma.-Elemene | herbal, waxy, fresh |
| .alpha.-Cubebene | herbal, waxy |
| .alpha.-Terpinyl acetate | herbal, bergamot, lavender, lime, citrus, woody, floral, waxy, clean, spicy |
| Copaene | piney, woody, spicy, honey |
| cis-geranyl acetate | floral, rose, lavender, green, waxy, herbal, cooling, |
| beta elemene | herbal, waxy, fresh |
| isoledene | pine, camphor |
| Sesquithujene | sweet, citrus |
| beta cyclogermacrane | green, woody |
| o-cresol | musty, phenolic, plastic, medicinal, herbal, leathery |
| Caryophyllene | fried, spice, wood |
| beta cedrene | pine, wood |
| cis-Thujopsene | woody, fresh |
| beta Gurjunene o calarene | woody, patchoulli |
| guaiyl acetate | Woody, fatty, green tea aroma |
| cadina-3,5-diene | spicy, fruity, mango |
| Humulene | earthy, slightly spicy, peppery flavour |
| .gamma.-Muurolene | herbal, woody, spicy |
| alfa curcumene | herbal |
| alfa cedrene | woody, cedar, sweet, fresh |
| alfa zingiberene | spice, fresh, harsh |
| cadina-3,5-dieene | spicy, fruity, mango |
| beta cubebene | herbal, waxy |
| .gamma.-Muurolene | herbal, woody, spicy |
| (-)-Aristolene | citrus |
| beta selinene | herbal |
| selina-diene | herbal, woody |
| gamma cadinene | fruity |
| Elixene | green, woody, oily |
| Neo-allo-ocimene | floral |
| beta cadinene | fresh, woody, herbal, vetiver, longifolone |
| beta sesquiphellandrene | herbal, fruit, wood |
| trans-Calamenene | weak spicy |
| delta cadinene | Thyme, herbal, woody, dry forest |
| isoledene | pine, camphor |
| alfa cadinene | woody, dry |
| .alpha.-Muurolene | herbal, woody, spicy |
| Selina-3,7(11)-diene | herbal, woody |
| .alpha.-Calacorene | woody |

1. **Results**
   1. **Ligand Scout**

Table 7 s.i. Ligand Scout classification.

| Rank | Code | Score | group |
| --- | --- | --- | --- |
| 1 | menthol | 1 | 1 |
| 2 | CID_6549_linalool | 0.9490667 | 3 |
| 3 | CID_160799_tau-cadinol | 0.9477515 | 3 |
| 4 | CID_443162_l-alpha-terpineol | 0.9423435 | 1 |
| 5 | CID_91710638_beta-Z-curcumen-12-ol | 0.9410372 | 1 |
| 6 | CID_335_o-cresol | 0.81200355 | 3 |
| 7 | CID_11230_terpinen-4-ol | 0.8110166 | 1 |
| 8 | CID_1549025_cis-geranylacetate | 0.8102495 | 2 |
| 9 | CID_5365847_ethyl-geranyl-ether | 0.8069671 | 3 |
| 10 | CID_111037_alpha-terpinylacetate | 0.80291015 | 1 |
| 11 | 142218_icilin | 0.80282354 | 1 |
| 12 | CID_30247_lavandulyl-acetate | 0.80278414 | 3 |
| 13 | CID_101412242_beta-Copaene-4-alpha-ol | 0.7972536 | 1 |
| 14 | CID_20055523_trans-4-thujanol | 0.79595846 | 1 |
| 15 | CID_567757_verbenyl-ethyl-ether | 0.79021454 | 2 |
| 16 | CID_53359349_sesquithujene | 0.6721983 | 3 |
| 17 | CID_5368451_cosmene | 0.67202616 | 3 |
| 18 | CID_65575_cedrol | 0.6717465 | 3 |
| 19 | CID_5281520_humulene | 0.6715817 | 4 |
| 20 | CID_7462_alpha-terpinene | 0.6709822 | 2 |
| 21 | CID_7460_alpha_phellandrene | 0.6709766 | 2 |
| 22 | CID_527424_p-Mentha-1,5,8-triene | 0.6709404 | 1 |
| 23 | CID_12302243_alpha-calacorene | 0.67077684 | 4 |
| 24 | CID_11106487_beta-sesquiphellandrene | 0.6706312 | 2 |
| 25 | CID_15094_gamma-cadinene | 0.6705701 | 4 |
| 26 | CID_85582292_24thujadiene | 0.67050713 | 3 |
| 27 | CID_261491_alpha-thujone | 0.6701555 | 2 |
| 29 | CID_102443_isoterpinolene | 0.6698435 | 3 |
| 30 | 4444848_beta-caryophyllene | 0.66869664 | 4 |
| 31 | CID_11127403_alpha-zingiberene | 0.667322 | 2 |
| 32 | CID_5371125_Neo-allo-ocimene | 0.66698045 | 4 |
| 33 | CID_92139_alpha-curcumene | 0.666465 | 2 |
| 34 | CID_10812_betacymene | 0.6629737 | 2 |
| 36 | CID_440967_betapinene | 0.6594067 | 1 |
| 37 | CID_2758_eucalyptol | 0.6587433 | 1 |
| 38 | CID_530421_aristolene | 0.65852463 | 3 |
| 40 | CID_11401461_cis-tujopsene | 0.6513102 | 2 |
| 44 | CID_441005_delta-cadinene | 0.6480405 | 3 |
| 45 | CID_11106485_beta-cedrene | 0.6419442 | 2 |
| 46 | CID_440917_d-limonene | 0.5526159 | 3 |
| 47 | CID_11463_alpha-terpinolene | 0.5506766 | 2 |
| 48 | CID_68316_perillene | 0.5431181 | 3 |
| 49 | CID_5315347_beta-cyclogermacrane | 0.54119027 | 2 |
| 50 | CID_2537_2-bornanone | 0.5398898 | 1 |
| 51 | CID_82227_alphapinene | 0.53985345 | 1 |
| 52 | CID_6432308_gamma-muurolene | 0.5390045 | 3 |
| 53 | CID_18818_sabinene | 0.53805625 | 2 |
| 54 | CID_442348_alpha-cedrene | 0.5375405 | 2 |
| 55 | CID_6616_camphene | 0.53667986 | 1 |
| 56 | CID_28930_alphafenchene | 0.5361088 | 1 |
| 57 | CID_17868_alphathujene | 0.53601986 | 2 |
| 58 | CID_12304570_silvestrene | 0.53443116 | 3 |
| 59 | CID_6432312_gamma-elemene | 0.5335888 | 2 |
| 60 | CID_12306048_alpha-cadinene | 0.53006595 | 4 |
| 62 | CID_28481_calarene | 0.52866906 | 3 |
| 63 | CID_10703_o-cymene | 0.5269456 | 2 |
| 64 | CID_26049_3-carene | 0.5266672 | 4 |
| 65 | CID_91746870_selina-1,4-diene | 0.5256925 | 2 |
| 66 | CID_94254_elixene | 0.5248542 | 2 |
| 69 | CID_10657_beta-cadinene | 0.52175695 | 2 |
| 70 | CID_6429022_trans-calamenene | 0.5197614 | 4 |
| 73 | CID_28237_beta-selinene | 0.5145636 | 2 |
| 76 | CID_240122_guaiyl-acetate | 0.5123403 | 3 |
| 78 | CID_442359_alpha-cubebene | 0.50577074 | 2 |
| 79 | CID_10106_isocineole | 0 | 1 |
| 80 | CID_50986185_cubenene | 0 | 2 |
| 81 | CID_522296_Selina-3,7-11-diene | 0 | 2 |
| 82 | CID_518814_beta-cubebene | 0 | 2 |
| 83 | CID_6918391_beta-elemene | 0 | 2 |
| 84 | CID_7461_gamma-terpinene | 0 | 2 |
| 85 | CID_5365847_ethyl-geranyl-ether | 0 | 3 |
| 86 | CID_68140_psilimonene | 0 | 3 |
| 87 | CID_31289_nonanal | 0 | 3 |
| 88 | CID_12343_1,4-cyclohexadiene | 0 | 3 |
| 89 | CID_7855_2-propenenitrile | 0 | 4 |
| 90 | CID_637563_anethole | 0 | 4 |
| 91 | CID_12222_2-propynal | 0 | 4 |
| 92 | 4444855_isocaryophyllene | 0 | 4 |
| 93 | CID_5281515_caryophyllene | 0 | 4 |

- 1. **Tanimoto**

Table 8 s.i. Tanimoto classification.

| Ranking | Compound Name | Tanimoto Similarity | group |
| --- | --- | --- | --- |
| 1 | menthol | 1 | 1 |
| 2 | CID_50986185_cubenene | 0,275 | 2 |
| 3 | CID_442359_alpha-cubebene | 0,268 | 2 |
| 4 | CID_518814_beta-cubebene | 0,268 | 2 |
| 5 | CID_101412242_beta-Copaene-4-alpha-ol | 0,227 | 1 |
| 6 | CID_160799_tau-cadinol | 0,227 | 3 |
| 7 | CID_441005_delta-cadinene | 0,225 | 3 |
| 8 | CID_12306048_alpha-cadinene | 0,220 | 4 |
| 9 | CID_15094_gamma-cadinene | 0,220 | 4 |
| 10 | CID_6432308_gamma-muurolene | 0,220 | 3 |
| 11 | CID_10657_beta-cadinene | 0,195 | 2 |
| 12 | CID_6429022_trans-calamenene | 0,195 | 4 |
| 13 | CID_91723677_cadina-3,5-diene | 0,186 | 4 |
| 14 | CID_102443_isoterpinolene | 0,167 | 3 |
| 15 | CID_11106487_beta-sesquiphellandrene | 0,167 | 2 |
| 16 | CID_20055523_trans-4-thujanol | 0,162 | 1 |
| 17 | CID_7460_alpha_phellandrene | 0,162 | 2 |
| 18 | CID_261491_alpha-thujone | 0,154 | 2 |
| 19 | CID_91746870_selina-1,4-diene | 0,152 | 2 |
| 20 | CID_11127403_alpha-zingiberene | 0,146 | 2 |
| 21 | CID_53359349_sesquithujene | 0,143 | 3 |
| 22 | CID_65575_cedrol | 0,143 | 3 |
| 23 | CID_68140_psilimonene | 0,143 | 3 |
| 24 | CID_6918391_beta-elemene | 0,140 | 2 |
| 25 | CID_12302243_alpha-calacorene | 0,136 | 4 |
| 26 | CID_6616_camphene | 0,135 | 1 |
| 27 | CID_440967_betapinene | 0,132 | 1 |
| 28 | CID_240122_guaiyl-acetate | 0,130 | 3 |
| 29 | CID_17868_alphathujene | 0,128 | 2 |
| 30 | CID_18818_sabinene | 0,128 | 2 |
| 31 | CID_28237_beta-selinene | 0,128 | 2 |
| 32 | CID_11230_terpinen-4-ol | 0,125 | 1 |
| 33 | CID_12304570_silvestrene | 0,125 | 3 |
| 34 | CID_440917_d-limonene | 0,125 | 3 |
| 35 | CID_443162_l-alpha-terpineol | 0,125 | 1 |
| 36 | CID_92139_alpha-curcumene | 0,116 | 2 |
| 37 | CID_10106_isocineole | 0,114 | 1 |
| 38 | CID_2758_eucalyptol | 0,114 | 1 |
| 39 | CID_28481_calarene | 0,111 | 3 |
| 40 | CID_7461_gamma-terpinene | 0,111 | 2 |
| 41 | CID_7462_alpha-terpinene | 0,111 | 2 |
| 42 | CID_11106485_beta-cedrene | 0,109 | 2 |
| 43 | CID_442348_alpha-cedrene | 0,109 | 2 |
| 44 | CID_530421_aristolene | 0,109 | 3 |
| 45 | CID_111037_alpha-terpinylacetate | 0,106 | 1 |
| 46 | CID_28930_alphafenchene | 0,105 | 1 |
| 47 | CID_2537_2-bornanone | 0,103 | 1 |
| 48 | CID_82227_alphapinene | 0,103 | 1 |
| 49 | CID_85582292_24thujadiene | 0,103 | 3 |
| 50 | CID_91710638_beta-Z-curcumen-12-ol | 0,102 | 1 |
| 51 | CID_527424_p-Mentha-1,5,8-triene | 0,098 | 1 |
| 52 | CID_30247_lavandulyl-acetate | 0,091 | 3 |
| 53 | CID_5315347_beta-cyclogermacrane | 0,089 | 2 |
| 54 | CID_567757_verbenyl-ethyl-ether | 0,089 | 2 |
| 55 | CID_5371125_Neo-allo-ocimene | 0,088 | 4 |
| 56 | CID_10703_o-cymene | 0,086 | 2 |
| 57 | 4444848_beta-caryophyllene | 0,085 | 3 |
| 58 | 4444855_isocaryophyllene | 0,085 | 3 |
| 59 | CID_5281515_caryophyllene | 0,085 | 3 |
| 60 | CID_6432312_gamma-elemene | 0,085 | 2 |
| 61 | CID_94254_elixene | 0,085 | 2 |
| 62 | CID_522296_Selina-3,7-11-diene | 0,083 | 2 |
| 63 | CID_10812_betacymene | 0,081 | 2 |
| 64 | CID_11463_alpha-terpinolene | 0,079 | 2 |
| 65 | CID_26049_3-carene | 0,077 | 4 |
| 66 | CID_6549_linalool | 0,075 | 3 |
| 67 | CID_5365847_ethyl-geranyl-ether | 0,071 | 3 |
| 68 | CID_1549025_cis-geranylacetate | 0,070 | 2 |
| 69 | CID_68316_perillene | 0,068 | 3 |
| 70 | CID_11401461_cis-tujopsene | 0,064 | 2 |
| 71 | CID_335_o-cresol | 0,059 | 3 |
| 72 | CID_31289_nonanal | 0,057 | 3 |
| 73 | CID_5368451_cosmene | 0,053 | 3 |
| 74 | CID_5281520_humulene | 0,044 | 4 |
| 75 | CID_12343_1,4-cyclohexadiene | 0,038 | 3 |
| 76 | CID_12222_2-propynal | 0,034 | 4 |
| 77 | CID_142218_icilin | 0,032 | 1 |
| 78 | CID_637563_anethole | 0,025 | 4 |
| 79 | CID_7855_2-propenenitrile | 0,000 | 4 |

- 1. **No ring collapse**

Table 9 s.i. No rings collapse classification.

| Ranking | Molecule | Similarity to menthol | group |
| --- | --- | --- | --- |
| 1 | menthol | 1,000 | 1 |
| 2 | CID_2758_eucalyptol | 0,809 | 1 |
| 3 | CID_518814_beta-cubebene | 0,746 | 2 |
| 4 | CID_442359_alpha-cubebene | 0,746 | 2 |
| 5 | CID_10106_isocineole | 0,745 | 1 |
| 6 | CID_91723677_cadina-3,5-diene | 0,743 | 4 |
| 7 | CID_50986185_cubenene | 0,742 | 2 |
| 8 | CID_101412242_beta-Copaene-4-alpha-ol | 0,718 | 1 |
| 9 | CID_160799_tau-cadinol | 0,710 | 3 |
| 10 | CID_443162_l-alpha-terpineol | 0,703 | 1 |
| 11 | CID_28930_alphafenchene | 0,699 | 1 |
| 12 | CID_91746870_selina-1,4-diene | 0,694 | 2 |
| 13 | CID_440967_betapinene | 0,691 | 1 |
| 14 | CID_2537_2-bornanone | 0,691 | 1 |
| 15 | CID_26049_3-carene | 0,691 | 4 |
| 16 | CID_7460_alpha_phellandrene | 0,688 | 2 |
| 17 | CID_6616_camphene | 0,686 | 1 |
| 18 | CID_68140_psilimonene | 0,685 | 3 |
| 19 | CID_261491_alpha-thujone | 0,682 | 2 |
| 20 | CID_15094_gamma-cadinene | 0,680 | 4 |
| 21 | CID_6432308_gamma-muurolene | 0,680 | 3 |
| 22 | CID_10657_beta-cadinene | 0,677 | 2 |
| 23 | CID_31289_nonanal | 0,674 | 3 |
| 24 | CID_20055523_trans-4-thujanol | 0,671 | 1 |
| 25 | CID_12304570_silvestrene | 0,670 | 3 |
| 26 | CID_82227_alphapinene | 0,669 | 1 |
| 27 | CID_440917_d-limonene | 0,669 | 3 |
| 28 | CID_441005_delta-cadinene | 0,667 | 3 |
| 29 | CID_102443_isoterpinolene | 0,666 | 3 |
| 30 | CID_11230_terpinen-4-ol | 0,664 | 1 |
| 31 | CID_6549_linalool | 0,661 | 3 |
| 32 | CID_6429022_trans-calamenene | 0,660 | 4 |
| 33 | CID_65575_cedrol | 0,658 | 3 |
| 34 | CID_567757_verbenyl-ethyl-ether | 0,656 | 2 |
| 35 | CID_12306048_alpha-cadinene | 0,655 | 4 |
| 36 | CID_18818_sabinene | 0,653 | 2 |
| 37 | CID_17868_alphathujene | 0,651 | 2 |
| 38 | CID_11106487_beta-sesquiphellandrene | 0,641 | 2 |
| 39 | 4444848_beta-caryophyllene | 0,639 | 4 |
| 40 | CID_5281515_caryophyllene | 0,639 | 4 |
| 41 | 4444855_isocaryophyllene | 0,639 | 4 |
| 42 | CID_7462_alpha-terpinene | 0,637 | 2 |
| 43 | CID_7461_gamma-terpinene | 0,637 | 2 |
| 44 | CID_28237_beta-selinene | 0,634 | 2 |
| 45 | CID_111037_alpha-terpinylacetate | 0,631 | 1 |
| 46 | CID_85582292_24thujadiene | 0,631 | 3 |
| 47 | CID_240122_guaiyl-acetate | 0,628 | 3 |
| 48 | CID_11127403_alpha-zingiberene | 0,628 | 2 |
| 49 | CID_11463_alpha-terpinolene | 0,626 | 2 |
| 50 | CID_530421_aristolene | 0,626 | 3 |
| 51 | CID_6918391_beta-elemene | 0,621 | 2 |
| 52 | CID_11106485_beta-cedrene | 0,617 | 2 |
| 53 | CID_5365847_ethyl-geranyl-ether | 0,605 | 3 |
| 54 | CID_91710638_beta-Z-curcumen-12-ol | 0,603 | 1 |
| 55 | CID_11401461_cis-tujopsene | 0,601 | 2 |
| 56 | CID_442348_alpha-cedrene | 0,600 | 2 |
| 57 | CID_53359349_sesquithujene | 0,597 | 3 |
| 58 | CID_28481_calarene | 0,593 | 3 |
| 59 | CID_1549025_cis-geranylacetate | 0,586 | 2 |
| 60 | CID_522296_Selina-3,7-11-diene | 0,585 | 2 |
| 61 | CID_30247_lavandulyl-acetate | 0,577 | 3 |
| 62 | CID_5315347_beta-cyclogermacrane | 0,573 | 2 |
| 63 | CID_94254_elixene | 0,565 | 2 |
| 64 | CID_6432312_gamma-elemene | 0,565 | 2 |
| 65 | CID_527424_p-Mentha-1,5,8-triene | 0,552 | 1 |
| 66 | CID_5371125_Neo-allo-ocimene | 0,546 | 4 |
| 67 | CID_12302243_alpha-calacorene | 0,546 | 4 |
| 68 | CID_92139_alpha-curcumene | 0,534 | 2 |
| 69 | CID_5281520_humulene | 0,531 | 4 |
| 70 | CID_10703_o-cymene | 0,509 | 2 |
| 71 | CID_68316_perillene | 0,500 | 3 |
| 72 | CID_5368451_cosmene | 0,472 | 3 |
| 73 | CID_10812_betacymene | 0,456 | 2 |
| 74 | CID_637563_anethole | 0,447 | 4 |
| 75 | CID_335_o-cresol | 0,414 | 3 |
| 76 | CID_12343_1,4-cyclohexadiene | 0,408 | 3 |
| 77 | 142218_icilin | 0,352 | 1 |
| 78 | CID_12222_2-propynal | 0,294 | 4 |
| 79 | CID_7855_2-propenenitrile | 0,294 | 4 |

- 1. **Ring collapse**

Table 10 s.i. Rings collapse classification.

| Ranking | Molecule | Similarity to menthol | group |
| --- | --- | --- | --- |
| 1 | menthol | 1,000 | 1 |
| 2 | CID_10106_isocineole | 0,821 | 1 |
| 3 | CID_2537_2-bornanone | 0,747 | 1 |
| 4 | CID_7460_alpha_phellandrene | 0,741 | 2 |
| 5 | CID_91723677_cadina-3,5-diene | 0,735 | 4 |
| 6 | CID_2758_eucalyptol | 0,712 | 1 |
| 7 | CID_518814_beta-cubebene | 0,707 | 2 |
| 8 | CID_101412242_beta-Copaene-4-alpha-ol | 0,690 | 1 |
| 9 | CID_50986185_cubenene | 0,688 | 2 |
| 10 | CID_160799_tau-cadinol | 0,685 | 3 |
| 11 | CID_11230_terpinen-4-ol | 0,669 | 1 |
| 12 | CID_440967_betapinene | 0,664 | 1 |
| 13 | CID_26049_3-carene | 0,659 | 4 |
| 14 | CID_82227_alphapinene | 0,658 | 1 |
| 15 | CID_6432308_gamma-muurolene | 0,655 | 3 |
| 16 | CID_15094_gamma-cadinene | 0,655 | 4 |
| 17 | CID_91746870_selina-1,4-diene | 0,655 | 2 |
| 18 | CID_68140_psilimonene | 0,652 | 3 |
| 19 | CID_12306048_alpha-cadinene | 0,651 | 4 |
| 20 | CID_10657_beta-cadinene | 0,651 | 2 |
| 21 | CID_440917_d-limonene | 0,647 | 3 |
| 22 | CID_12304570_silvestrene | 0,647 | 3 |
| 23 | CID_522296_Selina-3,7-11-diene | 0,646 | 2 |
| 24 | CID_7462_alpha-terpinene | 0,637 | 2 |
| 25 | CID_7461_gamma-terpinene | 0,637 | 2 |
| 26 | CID_442359_alpha-cubebene | 0,630 | 2 |
| 27 | CID_443162_l-alpha-terpineol | 0,621 | 1 |
| 28 | CID_6918391_beta-elemene | 0,618 | 2 |
| 29 | CID_28930_alphafenchene | 0,600 | 1 |
| 30 | CID_85582292_24thujadiene | 0,599 | 3 |
| 31 | CID_530421_aristolene | 0,574 | 3 |
| 32 | CID_441005_delta-cadinene | 0,573 | 3 |
| 33 | CID_6616_camphene | 0,568 | 2 |
| 34 | CID_28237_beta-selinene | 0,565 | 2 |
| 35 | CID_442348_alpha-cedrene | 0,562 | 3 |
| 36 | CID_102443_isoterpinolene | 0,562 | 3 |
| 37 | CID_11463_alpha-terpinolene | 0,557 | 2 |
| 38 | CID_111037_alpha-terpinylacetate | 0,555 | 1 |
| 39 | CID_11106485_beta-cedrene | 0,554 | 2 |
| 40 | CID_65575_cedrol | 0,550 | 3 |
| 41 | CID_11401461_cis-tujopsene | 0,546 | 2 |
| 42 | CID_11127403_alpha-zingiberene | 0,543 | 2 |
| 43 | CID_6432312_gamma-elemene | 0,539 | 2 |
| 44 | CID_94254_elixene | 0,539 | 2 |
| 45 | CID_11106487_beta-sesquiphellandrene | 0,521 | 2 |
| 46 | CID_527424_p-Mentha-1,5,8-triene | 0,504 | 1 |
| 47 | CID_91710638_beta-Z-curcumen-12-ol | 0,501 | 1 |
| 48 | CID_567757_verbenyl-ethyl-ether | 0,453 | 2 |
| 49 | CID_240122_guaiyl-acetate | 0,447 | 3 |
| 50 | 4444855_isocaryophyllene | 0,438 | 4 |
| 51 | CID_5281515_caryophyllene | 0,438 | 4 |
| 52 | CID_5281520_humulene | 0,437 | 4 |
| 53 | CID_20055523_trans-4-thujanol | 0,434 | 1 |
| 54 | CID_6549_linalool | 0,414 | 3 |
| 55 | 4444848_beta-caryophyllene | 0,412 | 4 |
| 56 | CID_261491_alpha-thujone | 0,404 | 2 |
| 57 | CID_12343_1,4-cyclohexadiene | 0,386 | 3 |
| 58 | CID_31289_nonanal | 0,370 | 3 |
| 59 | CID_17868_alphathujene | 0,360 | 2 |
| 60 | CID_28481_calarene | 0,359 | 3 |
| 61 | CID_5365847_ethyl-geranyl-ether | 0,358 | 3 |
| 62 | CID_18818_sabinene | 0,355 | 2 |
| 63 | CID_5315347_beta-cyclogermacrane | 0,355 | 2 |
| 64 | CID_10703_o-cymene | 0,350 | 2 |
| 65 | CID_1549025_cis-geranylacetate | 0,347 | 2 |
| 66 | CID_30247_lavandulyl-acetate | 0,347 | 3 |
| 67 | CID_5371125_Neo-allo-ocimene | 0,339 | 4 |
| 68 | CID_5368451_cosmene | 0,333 | 3 |
| 69 | CID_10812_betacymene | 0,329 | 2 |
| 70 | CID_68316_perillene | 0,313 | 3 |
| 71 | CID_6429022_trans-calamenene | 0,312 | 4 |
| 72 | CID_12302243_alpha-calacorene | 0,296 | 4 |
| 73 | CID_12222_2-propynal | 0,294 | 4 |
| 74 | CID_7855_2-propenenitrile | 0,294 | 4 |
| 75 | CID_53359349_sesquithujene | 0,284 | 3 |
| 76 | CID_92139_alpha-curcumene | 0,282 | 2 |
| 77 | CID_637563_anethole | 0,251 | 4 |
| 78 | CID_335_o-cresol | 0,204 | 3 |
| 79 | 142218_icilin | 0,063 | 1 |

- 1. **MACCS**

Table 11 si. MACCS classification.

| Ranking | Compound Name | Tanimoto Similarity | group |
| --- | --- | --- | --- |
| 1 | menthol | 1 | 1 |
| 2 | CID_20055523_trans-4-thujanol | 0,793 | 1 |
| 3 | CID_11230_terpinen-4-ol | 0,759 | 1 |
| 4 | CID_65575_cedrol | 0,733 | 3 |
| 5 | CID_160799_tau-cadinol | 0,719 | 3 |
| 6 | CID_2537_2-bornanone | 0,655 | 1 |
| 7 | CID_443162_l-alpha-terpineol | 0,655 | 1 |
| 8 | CID_101412242_beta-Copaene-4-alpha-ol | 0,647 | 1 |
| 9 | CID_10106_isocineole | 0,548 | 1 |
| 10 | CID_2758_eucalyptol | 0,548 | 1 |
| 11 | CID_261491_alpha-thujone | 0,533 | 2 |
| 12 | CID_6549_linalool | 0,516 | 3 |
| 13 | CID_91710638_beta-Z-curcumen-12-ol | 0,516 | 1 |
| 14 | CID_111037_alpha-terpinylacetate | 0,485 | 1 |
| 15 | CID_11463_alpha-terpinolene | 0,481 | 2 |
| 16 | CID_6432312_gamma-elemene | 0,467 | 2 |
| 17 | CID_94254_elixene | 0,467 | 2 |
| 18 | CID_11127403_alpha-zingiberene | 0,464 | 2 |
| 19 | CID_7460_alpha_phellandrene | 0,451 | 2 |
| 20 | CID_11106487_beta-sesquiphellandrene | 0,448 | 2 |
| 21 | CID_6918391_beta-elemene | 0,433 | 2 |
| 22 | CID_15094_gamma-cadinene | 0,419 | 4 |
| 23 | CID_441005_delta-cadinene | 0,419 | 3 |
| 24 | CID_6432308_gamma-muurolene | 0,419 | 3 |
| 25 | CID_91723677_cadina-3,5-diene | 0,419 | 4 |
| 26 | CID_102443_isoterpinolene | 0,407 | 3 |
| 27 | CID_7462_alpha-terpinene | 0,407 | 2 |
| 28 | CID_522296_Selina-3,7-11-diene | 0,406 | 2 |
| 29 | CID_12306048_alpha-cadinene | 0,400 | 4 |
| 30 | CID_28481_calarene | 0,400 | 3 |
| 31 | CID_5281520_humulene | 0,400 | 4 |
| 32 | CID_530421_aristolene | 0,400 | 3 |
| 33 | CID_240122_guaiyl-acetate | 0,395 | 3 |
| 34 | CID_442348_alpha-cedrene | 0,394 | 2 |
| 35 | CID_53359349_sesquithujene | 0,394 | 3 |
| 36 | CID_91746870_selina-1,4-diene | 0,394 | 2 |
| 37 | CID_12304570_silvestrene | 0,393 | 3 |
| 38 | CID_440917_d-limonene | 0,393 | 3 |
| 39 | CID_11106485_beta-cedrene | 0,382 | 2 |
| 40 | CID_11401461_cis-tujopsene | 0,382 | 2 |
| 41 | CID_1549025_cis-geranylacetate | 0,382 | 2 |
| 42 | CID_5365847_ethyl-geranyl-ether | 0,382 | 3 |
| 43 | CID_6429022_trans-calamenene | 0,379 | 4 |
| 44 | CID_92139_alpha-curcumene | 0,379 | 2 |
| 45 | CID_5315347_beta-cyclogermacrane | 0,375 | 2 |
| 46 | CID_50986185_cubenene | 0,373 | 2 |
| 47 | CID_442359_alpha-cubebene | 0,371 | 2 |
| 48 | CID_31289_nonanal | 0,370 | 3 |
| 49 | CID_335_o-cresol | 0,370 | 3 |
| 50 | CID_7461_gamma-terpinene | 0,370 | 2 |
| 51 | CID_10657_beta-cadinene | 0,367 | 2 |
| 52 | 4444848_beta-caryophyllene | 0,364 | 4 |
| 53 | 4444855_isocaryophyllene | 0,364 | 4 |
| 54 | CID_5281515_caryophyllene | 0,364 | 4 |
| 55 | CID_518814_beta-cubebene | 0,361 | 2 |
| 56 | CID_567757_verbenyl-ethyl-ether | 0,351 | 2 |
| 57 | CID_26049_3-carene | 0,344 | 4 |
| 58 | CID_28930_alphafenchene | 0,344 | 1 |
| 59 | CID_6616_camphene | 0,344 | 1 |
| 60 | CID_18818_sabinene | 0,333 | 2 |
| 61 | CID_28237_beta-selinene | 0,333 | 2 |
| 62 | CID_440967_betapinene | 0,333 | 1 |
| 63 | CID_68140_psilimonene | 0,321 | 3 |
| 64 | CID_17868_alphathujene | 0,313 | 2 |
| 65 | CID_637563_anethole | 0,310 | 4 |
| 66 | CID_68316_perillene | 0,273 | 3 |
| 67 | CID_10703_o-cymene | 0,269 | 2 |
| 68 | CID_82227_alphapinene | 0,250 | 1 |
| 69 | CID_10812_betacymene | 0,240 | 2 |
| 70 | CID_12302243_alpha-calacorene | 0,219 | 4 |
| 71 | CID_85582292_24thujadiene | 0,212 | 3 |
| 72 | CID_30247_lavandulyl-acetate | 0,200 | 3 |
| 73 | CID_527424_p-Mentha-1,5,8-triene | 0,179 | 1 |
| 74 | 142218_icilin | 0,149 | 1 |
| 75 | CID_5371125_Neo-allo-ocimene | 0,148 | 4 |
| 76 | CID_12343_1,4-cyclohexadiene | 0,120 | 3 |
| 77 | CID_5368451_cosmene | 0,071 | 3 |
| 78 | CID_12222_2-propynal | 0,038 | 4 |
| 79 | CID_7855_2-propenenitrile | 0,000 | 4 |

1. **Results with reduced database**
   1. **Ligand Scout**

Table 12 s.i. Ligand Scout classification.

| Rank | Code | Score | group |
| --- | --- | --- | --- |
| 1 | menthol | 1 | 1 |
| 2 | CID_443162_l-alpha-terpineol | 0.9423435 | 1 |
| 3 | CID_335_o-cresol | 0.81200355 | 3 |
| 4 | CID_11230_terpinen-4-ol | 0.8110166 | 1 |
| 5 | 142218_icilin | 0.80282354 | 1 |
| 6 | CID_20055523_trans-4-thujanol | 0.79595846 | 1 |
| 7 | CID_65575_cedrol | 0.6717465 | 3 |
| 8 | CID_5281520_humulene | 0.6715817 | 4 |
| 9 | CID_7462_alpha-terpinene | 0.6709822 | 2 |
| 10 | CID_7460_alpha_phellandrene | 0.6709766 | 2 |
| 11 | CID_527424_p-Mentha-1,5,8-triene | 0.6709404 | 1 |
| 12 | CID_12302243_alpha-calacorene | 0.67077684 | 4 |
| 13 | CID_15094_gamma-cadinene | 0.6705701 | 4 |
| 14 | CID_85582292_24thujadiene | 0.67050713 | 3 |
| 15 | CID_261491_alpha-thujone | 0.6701555 | 2 |
| 16 | CID_102443_isoterpinolene | 0.6698435 | 3 |
| 17 | 4444848_beta-caryophyllene | 0.66869664 | 4 |
| 18 | CID_10812_betacymene | 0.6629737 | 2 |
| 19 | CID_440967_betapinene | 0.6594067 | 1 |
| 20 | CID_2758_eucalyptol | 0.6587433 | 1 |
| 21 | CID_530421_aristolene | 0.65852463 | 3 |
| 22 | CID_11401461_cis-tujopsene | 0.6513102 | 2 |
| 23 | CID_441005_delta-cadinene | 0.6480405 | 3 |
| 24 | CID_11106485_beta-cedrene | 0.6419442 | 2 |
| 25 | CID_440917_d-limonene | 0.5526159 | 3 |
| 26 | CID_11463_alpha-terpinolene | 0.5506766 | 2 |
| 27 | CID_5315347_beta-cyclogermacrane | 0.54119027 | 2 |
| 29 | CID_2537_2-bornanone | 0.5398898 | 1 |
| 30 | CID_82227_alphapinene | 0.53985345 | 1 |
| 31 | CID_6432308_gamma-muurolene | 0.5390045 | 3 |
| 32 | CID_18818_sabinene | 0.53805625 | 2 |
| 33 | CID_442348_alpha-cedrene | 0.5375405 | 2 |
| 34 | CID_6616_camphene | 0.53667986 | 1 |
| 35 | CID_28930_alphafenchene | 0.5361088 | 1 |
| 36 | CID_17868_alphathujene | 0.53601986 | 2 |
| 37 | CID_12304570_silvestrene | 0.53443116 | 3 |
| 38 | CID_12306048_alpha-cadinene | 0.53006595 | 4 |
| 39 | CID_28481_calarene | 0.52866906 | 3 |
| 40 | CID_10703_o-cymene | 0.5269456 | 2 |
| 41 | CID_26049_3-carene | 0.5266672 | 4 |
| 42 | CID_91746870_selina-1,4-diene | 0.5256925 | 2 |
| 43 | CID_10657_beta-cadinene | 0.52175695 | 2 |
| 44 | CID_6429022_trans-calamenene | 0.5197614 | 4 |
| 45 | CID_28237_beta-selinene | 0.5145636 | 2 |
| 46 | CID_10106_isocineole | 0 | 1 |
| 47 | CID_50986185_cubenene | 0 | 2 |
| 48 | CID_522296_Selina-3,7-11-diene | 0 | 2 |
| 49 | CID_7461_gamma-terpinene | 0 | 2 |
| 50 | CID_68140_psilimonene | 0 | 3 |
| 51 | CID_7855_2-propenenitrile | 0 | 4 |
| 52 | CID_637563_anethole | 0 | 4 |
| 53 | CID_12222_2-propynal | 0 | 4 |
| 54 | 4444855_isocaryophyllene | 0 | 4 |
| 55 | CID_5281515_caryophyllene | 0 | 4 |

- 1. **Tanimoto results**

Table 13 s.i. Tanmoto classification.

| Ranking | Compound Name | Tanimoto Similarity | group |
| --- | --- | --- | --- |
| 1 | menthol | 1 | 1 |
| 2 | CID_50986185_cubenene | 0,275 | 2 |
| 3 | CID_441005_delta-cadinene | 0,225 | 3 |
| 4 | CID_12306048_alpha-cadinene | 0,220 | 4 |
| 5 | CID_15094_gamma-cadinene | 0,220 | 4 |
| 6 | CID_6432308_gamma-muurolene | 0,220 | 3 |
| 7 | CID_10657_beta-cadinene | 0,195 | 2 |
| 8 | CID_6429022_trans-calamenene | 0,195 | 4 |
| 9 | CID_91723677_cadina-3,5-diene | 0,186 | 4 |
| 10 | CID_102443_isoterpinolene | 0,167 | 3 |
| 11 | CID_20055523_trans-4-thujanol | 0,162 | 1 |
| 12 | CID_7460_alpha_phellandrene | 0,162 | 2 |
| 13 | CID_261491_alpha-thujone | 0,154 | 2 |
| 14 | CID_91746870_selina-1,4-diene | 0,152 | 2 |
| 15 | CID_65575_cedrol | 0,143 | 3 |
| 16 | CID_68140_psilimonene | 0,143 | 3 |
| 17 | CID_12302243_alpha-calacorene | 0,136 | 4 |
| 18 | CID_6616_camphene | 0,135 | 1 |
| 19 | CID_440967_betapinene | 0,132 | 1 |
| 20 | CID_17868_alphathujene | 0,128 | 2 |
| 21 | CID_18818_sabinene | 0,128 | 2 |
| 22 | CID_28237_beta-selinene | 0,128 | 2 |
| 23 | CID_11230_terpinen-4-ol | 0,125 | 1 |
| 24 | CID_12304570_silvestrene | 0,125 | 3 |
| 25 | CID_440917_d-limonene | 0,125 | 3 |
| 26 | CID_443162_l-alpha-terpineol | 0,125 | 1 |
| 27 | CID_10106_isocineole | 0,114 | 1 |
| 28 | CID_2758_eucalyptol | 0,114 | 1 |
| 29 | CID_28481_calarene | 0,111 | 3 |
| 30 | CID_7461_gamma-terpinene | 0,111 | 2 |
| 31 | CID_7462_alpha-terpinene | 0,111 | 2 |
| 32 | CID_11106485_beta-cedrene | 0,109 | 2 |
| 33 | CID_442348_alpha-cedrene | 0,109 | 2 |
| 34 | CID_530421_aristolene | 0,109 | 3 |
| 35 | CID_28930_alphafenchene | 0,105 | 1 |
| 36 | CID_2537_2-bornanone | 0,103 | 1 |
| 37 | CID_82227_alphapinene | 0,103 | 1 |
| 38 | CID_85582292_24thujadiene | 0,103 | 3 |
| 39 | CID_527424_p-Mentha-1,5,8-triene | 0,098 | 1 |
| 40 | CID_5315347_beta-cyclogermacrane | 0,089 | 2 |
| 41 | CID_10703_o-cymene | 0,086 | 2 |
| 42 | 4444848_beta-caryophyllene | 0,085 | 4 |
| 43 | 4444855_isocaryophyllene | 0,085 | 4 |
| 44 | CID_5281515_caryophyllene | 0,085 | 4 |
| 45 | CID_522296_Selina-3,7-11-diene | 0,083 | 2 |
| 46 | CID_10812_betacymene | 0,081 | 2 |
| 47 | CID_11463_alpha-terpinolene | 0,079 | 2 |
| 48 | CID_26049_3-carene | 0,077 | 4 |
| 49 | CID_11401461_cis-tujopsene | 0,064 | 2 |
| 50 | CID_335_o-cresol | 0,059 | 3 |
| 51 | CID_5281520_humulene | 0,044 | 4 |
| 52 | CID_12222_2-propynal | 0,034 | 4 |
| 53 | CID_142218_icilin | 0,032 | 1 |
| 54 | CID_637563_anethole | 0,025 | 4 |
| 55 | CID_7855_2-propenenitrile | 0,000 | 4 |

- 1. **No ring collapse**

Table 14 s.i. No rings collapse classification.

| Ranking | Molecule | Similarity to menthol | group |
| --- | --- | --- | --- |
| 1 | menthol | 1,000 | 1 |
| 2 | CID_2758_eucalyptol | 0,809 | 1 |
| 3 | CID_10106_isocineole | 0,745 | 1 |
| 4 | CID_91723677_cadina-3,5-diene | 0,743 | 4 |
| 5 | CID_50986185_cubenene | 0,742 | 2 |
| 6 | CID_443162_l-alpha-terpineol | 0,703 | 1 |
| 7 | CID_28930_alphafenchene | 0,699 | 1 |
| 8 | CID_91746870_selina-1,4-diene | 0,694 | 2 |
| 9 | CID_440967_betapinene | 0,691 | 1 |
| 10 | CID_2537_2-bornanone | 0,691 | 1 |
| 11 | CID_26049_3-carene | 0,691 | 4 |
| 12 | CID_7460_alpha_phellandrene | 0,688 | 2 |
| 13 | CID_6616_camphene | 0,686 | 1 |
| 14 | CID_68140_psilimonene | 0,685 | 3 |
| 15 | CID_261491_alpha-thujone | 0,682 | 2 |
| 16 | CID_15094_gamma-cadinene | 0,680 | 4 |
| 17 | CID_6432308_gamma-muurolene | 0,680 | 3 |
| 18 | CID_10657_beta-cadinene | 0,677 | 2 |
| 19 | CID_20055523_trans-4-thujanol | 0,671 | 1 |
| 20 | CID_12304570_silvestrene | 0,670 | 3 |
| 21 | CID_82227_alphapinene | 0,669 | 1 |
| 22 | CID_440917_d-limonene | 0,669 | 3 |
| 23 | CID_441005_delta-cadinene | 0,667 | 3 |
| 24 | CID_102443_isoterpinolene | 0,666 | 3 |
| 25 | CID_11230_terpinen-4-ol | 0,664 | 1 |
| 26 | CID_6429022_trans-calamenene | 0,660 | 4 |
| 27 | CID_65575_cedrol | 0,658 | 3 |
| 28 | CID_12306048_alpha-cadinene | 0,655 | 4 |
| 29 | CID_18818_sabinene | 0,653 | 2 |
| 30 | CID_17868_alphathujene | 0,651 | 2 |
| 31 | 4444848_beta-caryophyllene | 0,639 | 4 |
| 32 | CID_5281515_caryophyllene | 0,639 | 4 |
| 33 | 4444855_isocaryophyllene | 0,639 | 4 |
| 34 | CID_7462_alpha-terpinene | 0,637 | 2 |
| 35 | CID_7461_gamma-terpinene | 0,637 | 2 |
| 36 | CID_28237_beta-selinene | 0,634 | 2 |
| 37 | CID_85582292_24thujadiene | 0,631 | 3 |
| 38 | CID_11463_alpha-terpinolene | 0,626 | 2 |
| 39 | CID_530421_aristolene | 0,626 | 3 |
| 40 | CID_11106485_beta-cedrene | 0,617 | 2 |
| 41 | CID_11401461_cis-tujopsene | 0,601 | 2 |
| 42 | CID_442348_alpha-cedrene | 0,600 | 2 |
| 43 | CID_28481_calarene | 0,593 | 3 |
| 44 | CID_522296_Selina-3,7-11-diene | 0,585 | 2 |
| 45 | CID_5315347_beta-cyclogermacrane | 0,573 | 2 |
| 46 | CID_527424_p-Mentha-1,5,8-triene | 0,552 | 1 |
| 47 | CID_12302243_alpha-calacorene | 0,546 | 4 |
| 48 | CID_5281520_humulene | 0,531 | 4 |
| 49 | CID_10703_o-cymene | 0,509 | 2 |
| 50 | CID_10812_betacymene | 0,456 | 2 |
| 51 | CID_637563_anethole | 0,447 | 4 |
| 52 | CID_335_o-cresol | 0,414 | 3 |
| 53 | 142218_icilin | 0,352 | 1 |
| 54 | CID_12222_2-propynal | 0,294 | 4 |
| 55 | CID_7855_2-propenenitrile | 0,294 | 4 |

- 1. **Ring collapse**

Table 15 s.i. Rings collapse classification.

| Ranking | Molecule | Similarity to menthol | group |
| --- | --- | --- | --- |
| 1 | menthol | 1,000 | 1 |
| 2 | CID_10106_isocineole | 0,821 | 1 |
| 3 | CID_2537_2-bornanone | 0,747 | 1 |
| 4 | CID_7460_alpha_phellandrene | 0,741 | 2 |
| 5 | CID_91723677_cadina-3,5-diene | 0,735 | 4 |
| 6 | CID_2758_eucalyptol | 0,712 | 1 |
| 7 | CID_50986185_cubenene | 0,688 | 2 |
| 8 | CID_160799_tau-cadinol | 0,685 | 3 |
| 9 | CID_11230_terpinen-4-ol | 0,669 | 1 |
| 10 | CID_440967_betapinene | 0,664 | 1 |
| 11 | CID_26049_3-carene | 0,659 | 4 |
| 12 | CID_82227_alphapinene | 0,658 | 1 |
| 13 | CID_6432308_gamma-muurolene | 0,655 | 3 |
| 14 | CID_15094_gamma-cadinene | 0,655 | 4 |
| 15 | CID_91746870_selina-1,4-diene | 0,655 | 2 |
| 16 | CID_68140_psilimonene | 0,652 | 3 |
| 17 | CID_12306048_alpha-cadinene | 0,651 | 4 |
| 18 | CID_10657_beta-cadinene | 0,651 | 2 |
| 19 | CID_440917_d-limonene | 0,647 | 3 |
| 20 | CID_12304570_silvestrene | 0,647 | 3 |
| 21 | CID_522296_Selina-3,7-11-diene | 0,646 | 2 |
| 22 | CID_7462_alpha-terpinene | 0,637 | 2 |
| 23 | CID_7461_gamma-terpinene | 0,637 | 2 |
| 24 | CID_443162_l-alpha-terpineol | 0,621 | 1 |
| 25 | CID_28930_alphafenchene | 0,600 | 1 |
| 26 | CID_85582292_24thujadiene | 0,599 | 3 |
| 27 | CID_530421_aristolene | 0,574 | 3 |
| 28 | CID_441005_delta-cadinene | 0,573 | 3 |
| 29 | CID_6616_camphene | 0,568 | 2 |
| 30 | CID_28237_beta-selinene | 0,565 | 2 |
| 31 | CID_102443_isoterpinolene | 0,562 | 3 |
| 32 | CID_11463_alpha-terpinolene | 0,557 | 2 |
| 33 | CID_11106485_beta-cedrene | 0,554 | 2 |
| 34 | CID_65575_cedrol | 0,550 | 3 |
| 35 | CID_11401461_cis-tujopsene | 0,546 | 2 |
| 36 | CID_527424_p-Mentha-1,5,8-triene | 0,504 | 1 |
| 37 | 4444855_isocaryophyllene | 0,438 | 4 |
| 38 | CID_5281515_caryophyllene | 0,438 | 4 |
| 39 | CID_5281520_humulene | 0,437 | 4 |
| 40 | CID_20055523_trans-4-thujanol | 0,434 | 1 |
| 41 | 4444848_beta-caryophyllene | 0,412 | 4 |
| 42 | CID_261491_alpha-thujone | 0,404 | 2 |
| 43 | CID_17868_alphathujene | 0,360 | 2 |
| 44 | CID_28481_calarene | 0,359 | 3 |
| 45 | CID_18818_sabinene | 0,355 | 2 |
| 46 | CID_5315347_beta-cyclogermacrane | 0,355 | 2 |
| 47 | CID_10703_o-cymene | 0,350 | 2 |
| 48 | CID_10812_betacymene | 0,329 | 2 |
| 49 | CID_6429022_trans-calamenene | 0,312 | 4 |
| 50 | CID_12302243_alpha-calacorene | 0,296 | 4 |
| 51 | CID_12222_2-propynal | 0,294 | 4 |
| 52 | CID_7855_2-propenenitrile | 0,294 | 4 |
| 53 | CID_637563_anethole | 0,251 | 4 |
| 54 | CID_335_o-cresol | 0,204 | 3 |
| 55 | 142218_icilin | 0,063 | 1 |

- 1. **MACCS**

Table 16 si. MACCS classification.

| Ranking | Compound Name | Tanimoto Similarity | group |
| --- | --- | --- | --- |
| 1 | menthol | 1 | 1 |
| 2 | CID_20055523_trans-4-thujanol | 0,793 | 1 |
| 3 | CID_11230_terpinen-4-ol | 0,759 | 1 |
| 4 | CID_65575_cedrol | 0,733 | 3 |
| 5 | CID_2537_2-bornanone | 0,655 | 1 |
| 6 | CID_443162_l-alpha-terpineol | 0,655 | 1 |
| 7 | CID_10106_isocineole | 0,548 | 1 |
| 8 | CID_2758_eucalyptol | 0,548 | 1 |
| 9 | CID_261491_alpha-thujone | 0,533 | 2 |
| 10 | CID_11463_alpha-terpinolene | 0,481 | 2 |
| 11 | CID_7460_alpha_phellandrene | 0,451 | 2 |
| 12 | CID_15094_gamma-cadinene | 0,419 | 4 |
| 13 | CID_441005_delta-cadinene | 0,419 | 3 |
| 14 | CID_6432308_gamma-muurolene | 0,419 | 3 |
| 15 | CID_91723677_cadina-3,5-diene | 0,419 | 4 |
| 16 | CID_102443_isoterpinolene | 0,407 | 3 |
| 17 | CID_7462_alpha-terpinene | 0,407 | 2 |
| 18 | CID_522296_Selina-3,7-11-diene | 0,406 | 2 |
| 19 | CID_12306048_alpha-cadinene | 0,400 | 4 |
| 20 | CID_28481_calarene | 0,400 | 3 |
| 21 | CID_5281520_humulene | 0,400 | 4 |
| 22 | CID_530421_aristolene | 0,400 | 3 |
| 23 | CID_442348_alpha-cedrene | 0,394 | 2 |
| 24 | CID_91746870_selina-1,4-diene | 0,394 | 2 |
| 25 | CID_12304570_silvestrene | 0,393 | 3 |
| 26 | CID_440917_d-limonene | 0,393 | 3 |
| 27 | CID_11106485_beta-cedrene | 0,382 | 2 |
| 28 | CID_11401461_cis-tujopsene | 0,382 | 2 |
| 29 | CID_6429022_trans-calamenene | 0,379 | 4 |
| 30 | CID_5315347_beta-cyclogermacrane | 0,375 | 2 |
| 31 | CID_50986185_cubenene | 0,373 | 2 |
| 32 | CID_335_o-cresol | 0,370 | 3 |
| 33 | CID_7461_gamma-terpinene | 0,370 | 2 |
| 34 | CID_10657_beta-cadinene | 0,367 | 2 |
| 35 | 4444848_beta-caryophyllene | 0,364 | 4 |
| 36 | 4444855_isocaryophyllene | 0,364 | 4 |
| 37 | CID_5281515_caryophyllene | 0,364 | 4 |
| 38 | CID_26049_3-carene | 0,344 | 4 |
| 39 | CID_28930_alphafenchene | 0,344 | 1 |
| 40 | CID_6616_camphene | 0,344 | 1 |
| 41 | CID_18818_sabinene | 0,333 | 2 |
| 42 | CID_28237_beta-selinene | 0,333 | 2 |
| 43 | CID_440967_betapinene | 0,333 | 1 |
| 44 | CID_68140_psilimonene | 0,321 | 3 |
| 45 | CID_17868_alphathujene | 0,313 | 2 |
| 46 | CID_637563_anethole | 0,310 | 4 |
| 47 | CID_10703_o-cymene | 0,269 | 2 |
| 48 | CID_82227_alphapinene | 0,250 | 1 |
| 49 | CID_10812_betacymene | 0,240 | 2 |
| 50 | CID_12302243_alpha-calacorene | 0,219 | 4 |
| 51 | CID_85582292_24thujadiene | 0,212 | 3 |
| 52 | CID_527424_p-Mentha-1,5,8-triene | 0,179 | 1 |
| 53 | 142218_icilin | 0,149 | 1 |
| 54 | CID_12222_2-propynal | 0,038 | 4 |
| 55 | CID_7855_2-propenenitrile | 0,000 | 4 |

- 1. **QAOA**

Table 17 s.i. QAOA classification.

| Ranking | Molecule | Similarity to menthol | group |
| --- | --- | --- | --- |
| 1 | menthol | 1,000 | 1 |
| 2 | CID_10106_isocineole | 0,821 | 1 |
| 3 | CID_2537_2-bornanone | 0,747 | 1 |
| 4 | CID_7460_alpha_phellandrene | 0,741 | 2 |
| 5 | CID_2758_eucalyptol | 0,712 | 1 |
| 6 | CID_11230_terpinen-4-ol | 0,669 | 1 |
| 7 | CID_440967_betapinene | 0,664 | 1 |
| 8 | CID_28930_alphafenchene | 0,664 | 1 |
| 9 | CID_26049_3-carene | 0,659 | 4 |
| 10 | CID_82227_alphapinene | 0,658 | 1 |
| 11 | CID_91746870_selina-1,4-diene | 0,655 | 2 |
| 12 | CID_68140_psilimonene | 0,652 | 3 |
| 13 | CID_440917_d-limonene | 0,647 | 3 |
| 14 | CID_12304570_silvestrene | 0,647 | 3 |
| 15 | CID_7462_alpha-terpinene | 0,637 | 2 |
| 16 | CID_7461_gamma-terpinene | 0,637 | 2 |
| 17 | CID_443162_l-alpha-terpineol | 0,621 | 1 |
| 18 | CID_65575_cedrol | 0,610 | 3 |
| 19 | CID_85582292_24thujadiene | 0,599 | 3 |
| 20 | CID_530421_aristolene | 0,574 | 3 |
| 21 | CID_12306048_alpha-cadinene | 0,573 | 4 |
| 22 | 4444855_isocaryophyllene | 0,565 | 4 |
| 23 | CID_442348_alpha-cedrene | 0,562 | 2 |
| 24 | CID_102443_isoterpinolene | 0,562 | 3 |
| 25 | CID_11463_alpha-terpinolene | 0,557 | 2 |
| 26 | CID_11106485_beta-cedrene | 0,548 | 2 |
| 27 | CID_11401461_cis-tujopsene | 0,546 | 2 |
| 28 | CID_15094_gamma-cadinene | 0,499 | 4 |
| 29 | CID_6432308_gamma-muurolene | 0,499 | 3 |
| 30 | CID_91723677_cadina-3,5-diene | 0,499 | 4 |
| 31 | CID_10657_beta-cadinene | 0,495 | 2 |
| 32 | CID_6616_camphene | 0,486 | 1 |
| 33 | CID_50986185_cubenene | 0,468 | 2 |
| 34 | CID_5281515_caryophyllene | 0,438 | 4 |
| 35 | CID_5281520_humulene | 0,437 | 4 |
| 36 | CID_20055523_trans-4-thujanol | 0, 434 | 1 |
| 37 | CID_28237_beta-selinene | 0,420 | 2 |
| 38 | CID_522296_Selina-3,7-11-diene | 0,420 | 2 |
| 39 | CID_527424_p-Mentha-1,5,8-triene | 0,420 | 1 |
| 40 | CID_441005_delta-cadinene | 0,416 | 3 |
| 41 | 4444848_beta-caryophyllene | 0,412 | 4 |
| 42 | CID_261491_alpha-thujone | 0,404 | 2 |
| 43 | CID_17868_alphathujene | 0,360 | 2 |
| 44 | CID_28481_calarene | 0,359 | 3 |
| 45 | CID_18818_sabinene | 0,355 | 2 |
| 46 | CID_5315347_beta-cyclogermacrane | 0,355 | 2 |
| 47 | CID_10703_o-cymene | 0,350 | 2 |
| 48 | CID_6429022_trans-calamenene | 0,312 | 4 |
| 49 | CID_12222_2-propynal | 0,274 | 4 |
| 50 | CID_10812_betacymene | 0,260 | 2 |
| 51 | CID_7855_2-propenenitrile | 0,256 | 4 |
| 52 | CID_637563_anethole | 0,251 | 4 |
| 53 | CID_12302243_alpha-calacorene | 0,228 | 3 |
| 54 | CID_335_o-cresol | 0,204 | 3 |
| 55 | 142218_icilin | 0,063 | 1 |

- 1. **Digital quantum approach: the QAOA proposal**

Table 3 shows database parameters for the experiments, DE parameters, and information from the execution. Concerning the input data, the first columns illustrate the number of nodes of the conflict graph, the solution degeneracy (the number of possible solutions with the same energy), and the difference between the lowest and the second lowest energies normalised to the lowest one. The following two columns are related to DE being the optimiser tolerance and the maximum number of iterations. Finally, the last columns show execution information, such as the number of shots of the QAOA, the execution time, and whether there was postprocessing after the QAOA.

Table 17 si. QAOA experiments as labeled in the execution (ID) and gathered in the database (Name). By columns: the number of nodes, the solution degeneracy, the energy difference between the fundamental and the first excited states normalised to the fundamental state (**ΔE/E**), the two DE parameters, the tolerance (tol) and the maximum number of iterations (maxiter), the number of shots, the execution time in hours, and whether there was postprocessing or not.

| **ID** | **Name** | **Nodes** | **Deg** | **ΔE/E** | **tol** | **maxiter** | **Shots** | **t(h)** | **Postprocessing** |
| --- | --- | --- | --- | --- | --- | --- | --- | --- | --- |
| **1** | 142218_icilin | 4 | 1 | 5.97x10-2 | 10-8 | 8000 | 10000 | 0.14 | False |
| **2** | CID_335_o-cresol | 4 | 3 | 6.86x10-2 | 10-8 | 8000 | 10000 | 0.11 | False |
| **3** | CID_12222_2-propynal | 13 | 6 | 2.74x10-3 | 10-8 | 5000 | 100000 | 11.41 | False |
| **4** | CID_26049_3-carene | 13 | 2 | 2.47x10-2 | 10-8 | 26000 | 10000 | 11.07 | False |
| **5** | CID_7855_2-propenenitrile | 13 | 6 | 4.13x10-3 | 10-8 | 5000 | 100000 | 11.26 | False |
| **6** | CID_2758_eucalyptol | 14 | 2 | 1.99x10-2 | 10-8 | 4000 | 10000 | 2.54 | False |
| **7** | CID_28930_alphafenchene | 14 | 2 | 4.48x10-3 | 10-8 | 28000 | 10000 | 16.87 | False |
| **8** | CID_440967_betapinene | 14 | 2 | 9.40x10-3 | 10-8 | 28000 | 10000 | 16.91 | False |
| **9** | CID_6616_camphene | 14 | 1 | 5.96x10-4 | 10-8 | 5000 | 10000 | 3.32 | False |
| **10** | CID_82227_alphapinene | 14 | 2 | 9.01x10-3 | 10-8 | 28000 | 10000 | 18.66 | False |
| **11** | CID_2537_2-bornanone | 15 | 2 | 1.46x10-2 | 10-4 | 30000 | 10000 | 21.62 | False |
| **12** | CID_10703_o-cymene | 16 | 2 | 1.29x10-2 | 10-8 | 32000 | 1024 | 17.97 | False |
| **13** | CID_10812_betacymene | 16 | 2 | 1.57x10-7 | 10-6 | 32000 | 10000 | 35.45 | False |
| **14** | CID_17868_alphathujene | 16 | 2 | 1.35x10-2 | 10-8 | 32000 | 1024 | 18.04 | False |
| **15** | CID_18818_sabinene | 16 | 2 | 1.38x10-2 | 10-8 | 32000 | 1024 | 16.31 | False |
| **16** | CID_102443_isoterpinolene | 17 | 2 | 1.02x10-2 | 10-6 | 34000 | 10000 | 56.36 | False |
| **17** | CID_11463_alpha-terpinolene | 17 | 2 | 1.04x10-2 | 10-6 | 34000 | 10000 | 55.06 | False |
| **18** | CID_12304570_silvestrene | 17 | 2 | 2.37x10-2 | 10-6 | 34000 | 10000 | 56.84 | False |
| **19** | CID_20055523_trans-4-thujanol | 16 | 2 | 1.37x10-2 | 10-6 | 32000 | 10000 | 33.76 | True |
| **20** | CID_440917_d-limonene | 17 | 1 | 2.02x10-16 | 10-6 | 34000 | 10000 | 56.59 | False |
| **21** | CID_527424_p-Mentha-1,5,8-triene | 17 | 2 | 1.16x10-2 | 10-6 | 34000 | 10000 | 59.19 | False |
| **22** | CID_5281520_humulene | 17 | 1 | 7.45x10-5 | 10-8 | 34000 | 10000 | 54.87 | False |
| **23** | CID_530421_aristolene | 17 | 2 | 1.46x10-2 | 10-8 | 34000 | 10000 | 54.58 | False |
| **24** | CID_637563_anethole | 17 | 2 | 3.04x10-12 | 10-8 | 34000 | 10000 | 54.86 | False |
| **25** | CID_68140_psilimonene | 17 | 2 | 2.35x10-3 | 10-8 | 34000 | 10000 | 57.21 | False |
| **26** | CID_7460_alpha_phellandrene | 17 | 2 | 1.18x10-2 | 10-8 | 34000 | 10000 | 56.14 | False |
| **27** | CID_7461_gamma-terpinene | 17 | 2 | 1.13x10-2 | 10-8 | 34000 | 10000 | 55.87 | False |
| **28** | CID_7462_alpha-terpinene | 17 | 2 | 1.13x10-2 | 10-8 | 34000 | 10000 | 56.04 | False |
| **29** | CID_85582292_24thujadiene | 17 | 2 | 1.11x10-2 | 10-8 | 34000 | 10000 | 55.64 | False |
| **30** | 4444848_beta-caryophyllene | 18 | 2 | 4.47x10-3 | 10-8 | 5000 | 10000 | 14.20 | False |
| **31** | 4444855_isocaryophyllene | 18 | 2 | 3.41x10-3 | 10-8 | 5000 | 10000 | 14.23 | False |
| **32** | CID_10106_isocineole | 18 | 2 | 9.69x10-3 | 10-8 | 5000 | 10000 | 13.92 | False |
| **33** | CID_11230_terpinen-4-ol | 18 | 2 | 1.12x10-2 | 10-8 | 5000 | 10000 | 13.63 | False |
| **34** | CID_11401461_cis-tujopsene | 18 | 2 | 3.58x10-4 | 10-8 | 5000 | 10000 | 14.24 | False |
| **35** | CID_261491_alpha-thujone | 18 | 2 | 7.35x10-4 | 10-8 | 5000 | 10000 | 13.17 | False |
| **36** | CID_443162_l-alpha-terpineol | 18 | 2 | 9.18x10-3 | 10-8 | 5000 | 10000 | 14.14 | False |
| **37** | CID_5281515_caryophyllene | 18 | 2 | 1.16x10-2 | 10-8 | 5000 | 10000 | 14.41 | False |
| **38** | CID_5315347_beta-cyclogermacrane | 18 | 2 | 1.17x10-2 | 10-8 | 5000 | 10000 | 14.3 | False |
| **39** | menthol_bs_biblio_ob | 17 | 2 | 1.49x10-2 | 10-8 | 5000 | 10000 | 8.31 | True |
| **40** | CID_11106485_beta-cedrene | 19 | 2 | 6.70x10-3 | 10-8 | 5000 | 10000 | 29.14 | False |
| **41** | CID_28481_calarene | 19 | 2 | 2.29x10-3 | 10-8 | 5000 | 10000 | 26.87 | False |
| **42** | CID_442348_alpha-cedrene | 19 | 2 | 8.16x10-3 | 10-8 | 5000 | 10000 | 28.85 | False |
| **43** | CID_12302243_alpha-calarorene | 20 | 2 | 1.12x10-15 | 10-8 | 5000 | 10000 | 55.28 | False |
| **44** | CID_6429022_trans-calamenene | 20 | 2 | 2.86x10-4 | 10-8 | 5000 | 10000 | 63.03 | False |
| **45** | CID_65575_cedrol | 20 | 2 | 7.91x10-4 | 10-8 | 5000 | 10000 | 51.53 | False |
| **46** | CID_12306048_alpha-cadinene | 22 | 2 | 8.51x10-3 | 10-8 | 1000 | 10000 | 61.22 | True |
| **47** | CID_15094_gamma-cadinene | 22 | 2 | 8.16x10-3 | 10-8 | 1000 | 10000 | 54.35 | True |
| **48** | CID_28237_beta-selinene | 22 | 6 | 4.85x10-4 | 10-8 | 1000 | 10000 | 62.38 | True |
| **49** | CID_441005_delta-cadinene | 22 | 2 | 5.20x10-4 | 10-8 | 1000 | 10000 | 60.39 | True |
| **50** | CID_50986185_cubenene | 22 | 2 | 5.15x10-4 | 10-8 | 1000 | 10000 | 63.56 | True |
| **51** | CID_522296_Selina-3,7-11-diene | 22 | 2 | 5.55x10-12 | 10-8 | 1000 | 10000 | 59.46 | True |
| **52** | CID_6432308_gamma-muurolene | 22 | 2 | 8.03x10-3 | 10-8 | 1000 | 10000 | 61.34 | True |
| **53** | CID_91723677_cadina-3,5-diene | 22 | 2 | 9.12x10-3 | 10-8 | 1000 | 10000 | 59.51 | True |
| **54** | CID_91746870_selina-1,4-diene | 22 | 2 | 8.58x10-3 | 10-8 | 1000 | 10000 | 23.81 | False |
| **55** | CID_10657_beta-cadinene | 22 | 2 | 8.51x10-3 | 10-8 | 1000 | 10000 | 61.21 | True |
